# Supplementary material
Source: publisher figshare collection journal article supplement (https://sage.figshare.com/ndownloader/files/13193117)
Supplement: Supplementary file 1 [file 13193117]

## Appendix S2

### Levels of Evidence in Study 1

|                             |                                                                                  |
|-----------------------------|----------------------------------------------------------------------------------|
| <i>Scientific Reports</i>   |                                                                                  |
| <u>Levels of Evidence</u>   | <u>Statement presented</u>                                                       |
| Strong negative             | One group of scientists found that X makes Y 4 times more likely                 |
| Weak negative               | One group of scientists found that X makes Y 2 times more likely                 |
| Neutral                     | One group of scientists found that X does not change likelihood of Y             |
| Weak positive               | One group of scientists found that X makes Y 2 times less likely                 |
| Strong positive             | One group of scientists found that X makes Y 4 times less likely                 |
| <i>Eyewitness Testimony</i> |                                                                                  |
| <u>Levels of Evidence</u>   | <u>Statement presented</u>                                                       |
| Strong negative             | One witness is 100% confident that the defendant did not commit crime X.         |
| Weak negative               | One witness is 50% confident that the defendant did not commit crime X.          |
| Neutral                     | One witness is completely unsure if the defendant did or did not commit crime X. |
| Weak positive               | One witness is 50% confident that the defendant did commit crime X.              |
| Strong positive             | One witness is 100% confident that the defendant did commit crime X.             |
| <i>Social Judgments</i>     |                                                                                  |
| <u>Levels of Evidence</u>   | <u>Statement presented</u>                                                       |
| Strong negative             | One person says it's extremely unlikely that your X will Y                       |
| Weak negative               | One person says it's somewhat unlikely that your X will Y                        |
| Neutral                     | One person says it's neither likely nor unlikely your X will Y                   |
| Weak positive               | One person says it's somewhat likely that your X will Y                          |
| Strong positive             | One person says it's extremely likely that your X will Y                         |
| <i>Consumer Reviews</i>     |                                                                                  |
| <u>Levels of Evidence</u>   | <u>Statement presented</u>                                                       |
| Strong negative             | One friend says, "my experience with that X was extremely bad."                  |

|                 |                                                                        |
|-----------------|------------------------------------------------------------------------|
| Weak negative   | One friend says, “my experience with that X was moderately bad.”       |
| Neutral         | One friend says, “my experience with that X was neither good nor bad.” |
| Weak positive   | One friend says, “my experience with that X was moderately good.”      |
| Strong positive | One friend says, “my experience with that X was extremely good.”       |

---
